# Supplementary material for: Effective Removal of Chromium(III) from Low Concentration Aqueous Solution Using a Novel Diazene/Methoxy-Laced Coordination Polymer
Source: Polymers (Basel). 2017 Jul 9;9(7):273. doi: 10.3390/polym9070273 (PMC6431845; doi:10.3390/polym9070273)
Supplement: Supplementary file 1 [file polymers-09-00273-s001.zip › Supplementary Information.pdf]

Article

# Effective Removal of Chromium(III) from Low Concentration Aqueous Solution Using a Novel Diazene/Methoxy-Laced Coordination Polymer

Lei-Lei Liu \*, Yun Xing, Hui-Ying Yu, Cai-Wen Zhang, Meng-Qi Ye, Ming-Zhen Miao and Cai-Xia Yu \*

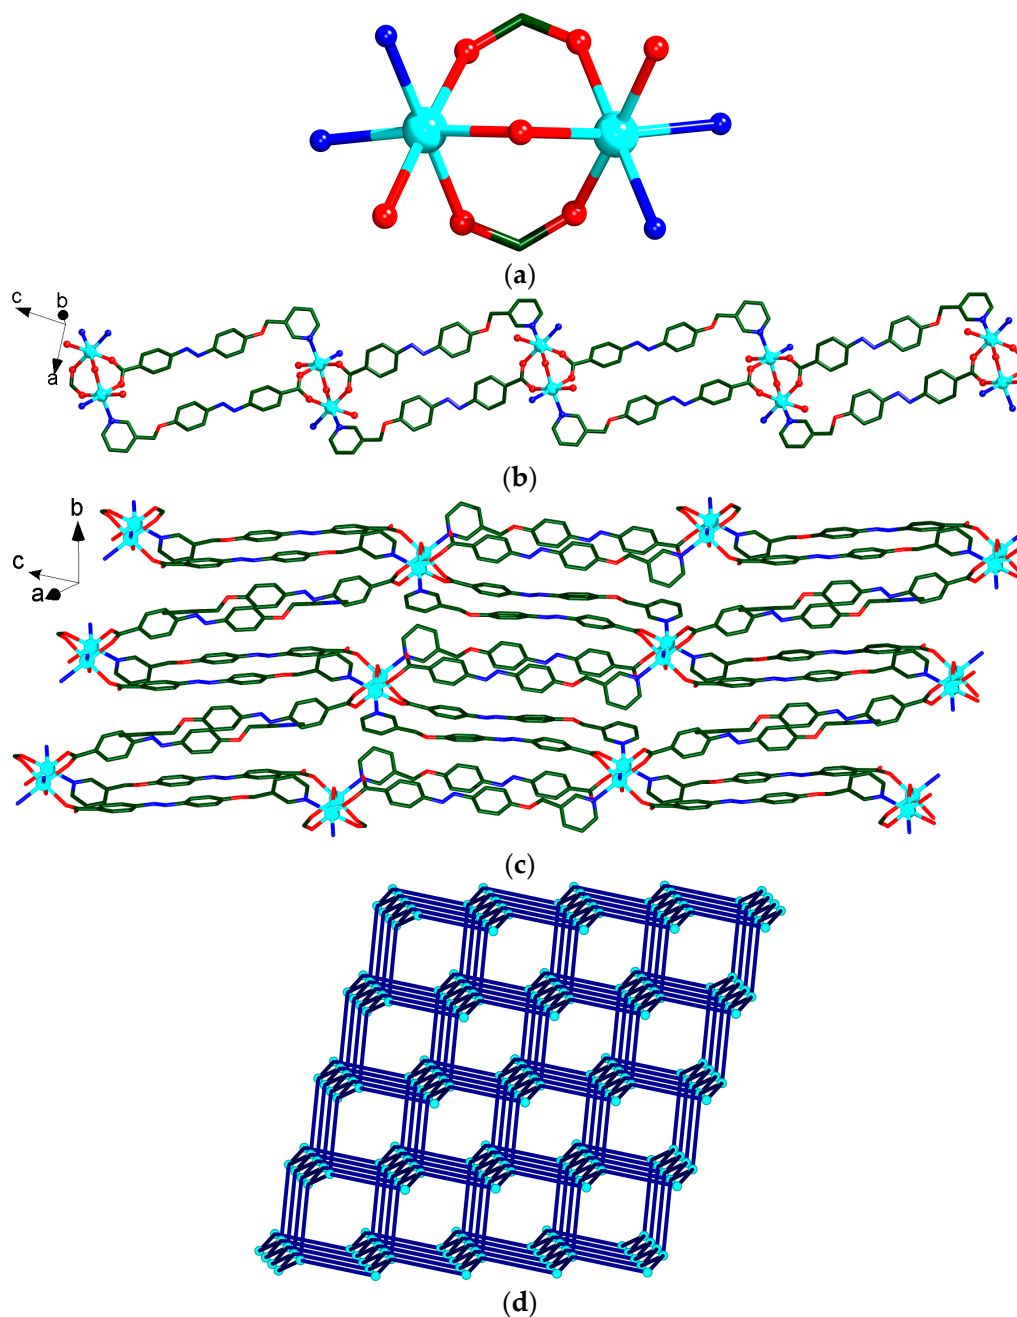

**Figure S1.** (a) View of dinuclear  $[\text{Cd}_2(\text{CO}_2)_2(\text{H}_2\text{O})]$  unit of **1**. (b) View of a 1D double chain in **1** extending along the  $ac$  plane. (c) View of a 2D layer in **1** extending along the  $bc$  plane. (d) Schematic view of the 4-connected  $6^6$  topology of **1**. Atom color codes: Cd, cyan; O, red; N, blue; C, dark green and pink.

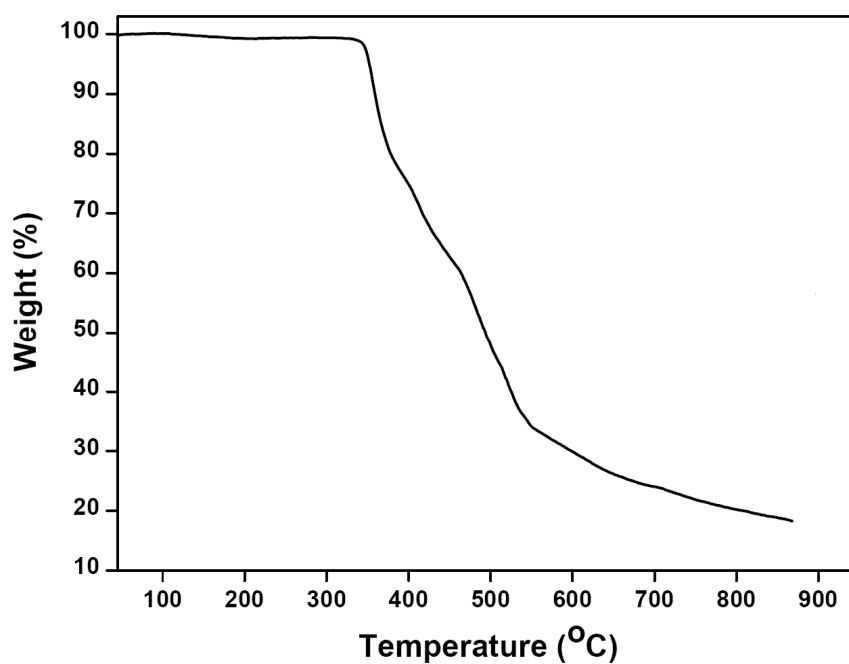

Figure S2. TG curve coupled with IR spectra of 1.

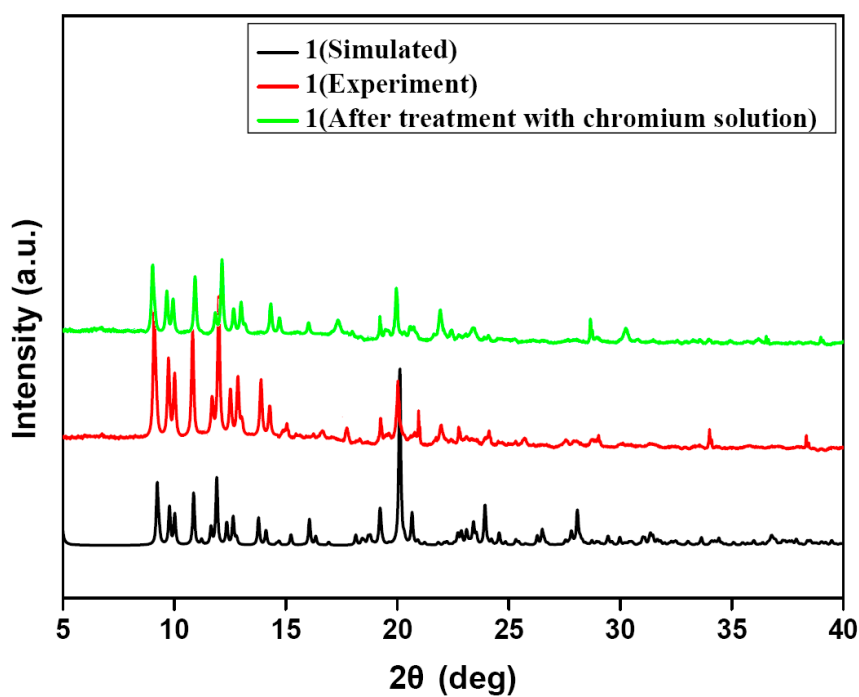

Figure S3. The PXRD patterns from simulated single crystal data, of as-synthesized samples, of as-synthesized samples after immersing in chromium solution.

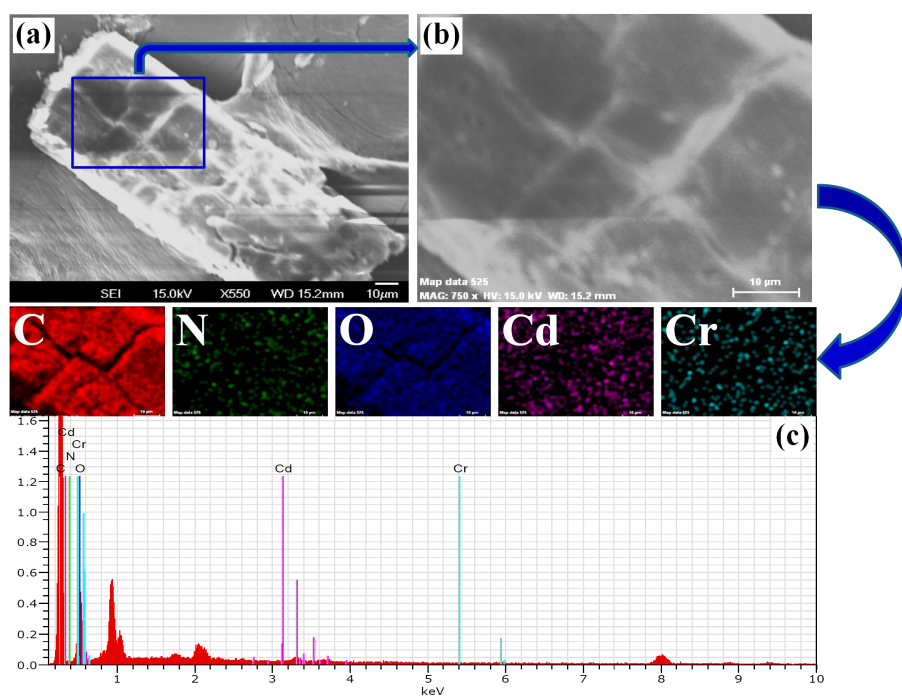

**Figure S4.** (a–b) SEM images of the section for samples after loading Cr(III). (c) EDS spectra of the section for samples after loading Cr(III).

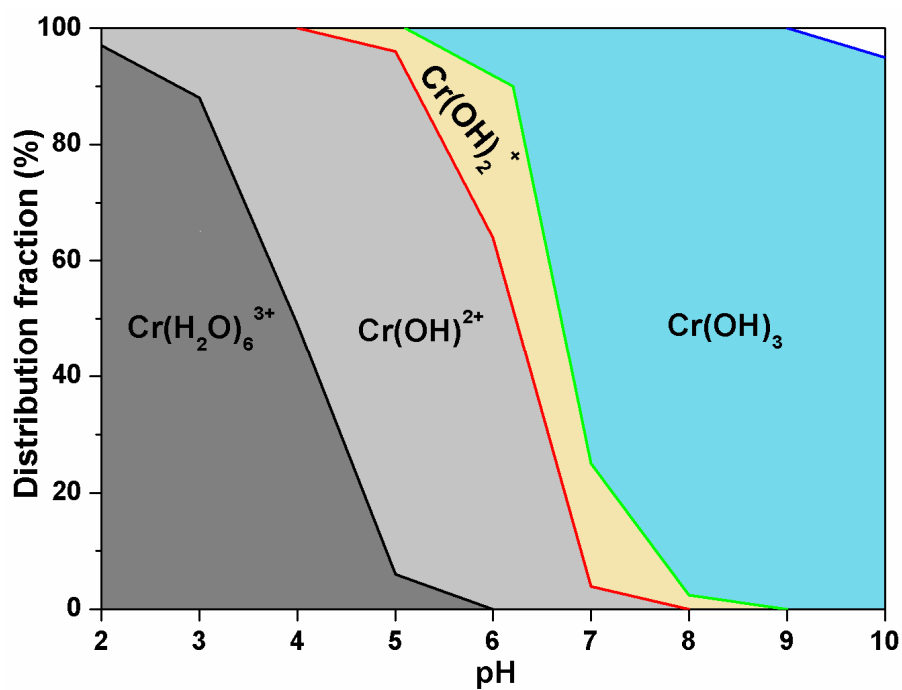

**Figure S5.** Effect of pH on the Cr(III) distribution in aqueous solution (1 ppm).

**Table S1.** Summary of Crystallographic Data for **1**.

|                                           |                                                                                 |
|-------------------------------------------|---------------------------------------------------------------------------------|
| Empirical Formula                         | C <sub>76</sub> H <sub>58</sub> Cd <sub>2</sub> N <sub>12</sub> O <sub>13</sub> |
| Formula Weight                            | 1572.14                                                                         |
| Crystal System                            | monoclinic                                                                      |
| Space Group                               | C2/c                                                                            |
| <i>a</i> (Å)                              | 12.430(3)                                                                       |
| <i>b</i> (Å)                              | 15.186(3)                                                                       |
| <i>c</i> (Å)                              | 36.429(7)                                                                       |
| $\alpha$ (°)                              | 90                                                                              |
| $\beta$ (°)                               | 97.23(3)                                                                        |
| $\gamma$ (°)                              | 90                                                                              |
| <i>V</i> (Å <sup>3</sup> )                | 6822(2)                                                                         |
| <i>Z</i>                                  | 4                                                                               |
| <i>T</i> (K)                              | 296(2)                                                                          |
| $\rho_{\text{calc}}$ (g/cm <sup>3</sup> ) | 1.531                                                                           |
| F(000)                                    | 3192                                                                            |
| $\mu$ (MoK $\alpha$ , mm <sup>-1</sup> )  | 0.699                                                                           |
| Total reflections                         | 25933                                                                           |
| Unique reflections                        | 6001 ( <i>R</i> <sub>int</sub> = 0.0459)                                        |
| No. of observations                       | 4471                                                                            |
| No. of parameters                         | 465                                                                             |
| <i>R</i> <sub>1</sub> <sup>a</sup>        | 0.0364                                                                          |
| <i>wR</i> <sub>2</sub> <sup>b</sup>       | 0.0857                                                                          |
| GOF <sup>c</sup>                          | 1.022                                                                           |

<sup>a</sup>  $R_1 = \sum ||F_o| - |F_c|| / \sum |F_o|$ , <sup>b</sup>  $wR_2 = \{\sum w(F_o^2 - F_c^2)^2 / \sum w(F_o^2)^2\}^{1/2}$ , <sup>c</sup> GOF =  $\{\sum w(F_o^2 - F_c^2)^2 / (n - p)\}^{1/2}$ , where *n* = number of reflections and *p* = total numbers of parameters refined.

**Table S2.** Comparison of Ionic Potential.

| Metal ions        | Na <sup>+</sup> | Mg <sup>2+</sup> | K <sup>+</sup> | Ca <sup>2+</sup> | Cr <sup>3+</sup> | Mn <sup>2+</sup> | Co <sup>2+</sup> | Ni <sup>2+</sup> | Cu <sup>2+</sup> |
|-------------------|-----------------|------------------|----------------|------------------|------------------|------------------|------------------|------------------|------------------|
| Zn <sup>2+</sup>  |                 |                  |                |                  |                  |                  |                  |                  |                  |
| Ionic Radius (pm) | 102             | 72               | 138            | 100              | 62               | 67               | 65               | 69               | 73               |
| 74                |                 |                  |                |                  |                  |                  |                  |                  |                  |
| Ionic Potential   | 0.0098          | 0.0278           | 0.0072         | 0.0200           | 0.0484           | 0.0299           | 0.0308           | 0.0290           |                  |
| 0.0274            | 0.0270          |                  |                |                  |                  |                  |                  |                  |                  |
