# Supplementary material for: Effective Removal of Chromium(III) from Low Concentration Aqueous Solution Using a Novel Diazene/Methoxy-Laced Coordination Polymer
Source: Polymers (Basel). 2017 Jul 9;9(7):273. doi: 10.3390/polym9070273 (PMC6431845; doi:10.3390/polym9070273)
Supplement: Supplementary file 1 [file polymers-09-00273-s001.zip › The single crystal data of polymer 1.CIF]

 
data_t 
 
_audit_creation_method            SHELXL-97 
_chemical_name_systematic 
; 
 ? 
; 
_chemical_name_common             ? 
_chemical_melting_point           ? 
_chemical_formula_moiety          
'C76 H58 Cd2 N12 O13'
_chemical_formula_sum 
 'C76 H58 Cd2 N12 O13' 
_chemical_formula_weight          1572.14 
 
loop_ 
 _atom_type_symbol 
 _atom_type_description 
 _atom_type_scat_dispersion_real 
 _atom_type_scat_dispersion_imag 
 _atom_type_scat_source 
 'C'  'C'   0.0033   0.0016 
 'International Tables Vol C Tables 4.2.6.8 and 6.1.1.4' 
 'H'  'H'   0.0000   0.0000 
 'International Tables Vol C Tables 4.2.6.8 and 6.1.1.4' 
 'N'  'N'   0.0061   0.0033 
 'International Tables Vol C Tables 4.2.6.8 and 6.1.1.4' 
 'O'  'O'   0.0106   0.0060 
 'International Tables Vol C Tables 4.2.6.8 and 6.1.1.4' 
 'Cd'  'Cd'  -0.8075   1.2024 
 'International Tables Vol C Tables 4.2.6.8 and 6.1.1.4' 
 
_symmetry_cell_setting             monoclinic 
_symmetry_space_group_name_H-M     'C 2/c'
_symmetry_space_group_name_Hall    'C 2yc '

loop_ 
 _symmetry_equiv_pos_as_xyz 
 'x, y, z' 
 '-x, y, -z+1/2' 
 'x+1/2, y+1/2, z' 
 '-x+1/2, y+1/2, -z+1/2' 
 '-x, -y, -z' 
 'x, -y, z-1/2' 
 '-x+1/2, -y+1/2, -z' 
 'x+1/2, -y+1/2, z-1/2' 
 
_cell_length_a                    12.430(3) 
_cell_length_b                    15.186(3) 
_cell_length_c                    36.429(7) 
_cell_angle_alpha                 90.00 
_cell_angle_beta                  97.23(3) 
_cell_angle_gamma                 90.00 
_cell_volume                      6822(2) 
_cell_formula_units_Z             4 
_cell_measurement_temperature     296(2) 
_cell_measurement_reflns_used     5416 
_cell_measurement_theta_min       2.50 
_cell_measurement_theta_max       23.31 
 
_exptl_crystal_description        block 
_exptl_crystal_colour             orange 
_exptl_crystal_size_max           0.20 
_exptl_crystal_size_mid           0.20 
_exptl_crystal_size_min           0.10 
_exptl_crystal_density_meas       ? 
_exptl_crystal_density_diffrn     1.531 
_exptl_crystal_density_method     'not measured' 
_exptl_crystal_F_000              3192 
_exptl_absorpt_coefficient_mu     0.699 
_exptl_absorpt_correction_type    multi-scan 
_exptl_absorpt_correction_T_min   0.8728 
_exptl_absorpt_correction_T_max   0.9334 
_exptl_absorpt_process_details    sadabs 
 
_exptl_special_details 
; 
 ? 
; 
 
_diffrn_ambient_temperature       296(2) 
_diffrn_radiation_wavelength      0.71073 
_diffrn_radiation_type            MoK\a 
_diffrn_radiation_source          'fine-focus sealed tube' 
_diffrn_radiation_monochromator   graphite 
_diffrn_measurement_device_type   'Bruker APEX-II CCD' 
_diffrn_measurement_method        '\f and \w scans' 
_diffrn_detector_area_resol_mean  ? 
_diffrn_standards_number          0 
_diffrn_standards_interval_count  ? 
_diffrn_standards_interval_time   ? 
_diffrn_standards_decay_%         ?
_diffrn_reflns_number             25933 
_diffrn_reflns_av_R_equivalents   0.0459 
_diffrn_reflns_av_sigmaI/netI     0.0375 
_diffrn_reflns_limit_h_min        -14 
_diffrn_reflns_limit_h_max        12 
_diffrn_reflns_limit_k_min        -18 
_diffrn_reflns_limit_k_max        18 
_diffrn_reflns_limit_l_min        -43 
_diffrn_reflns_limit_l_max        43 
_diffrn_reflns_theta_min          2.25 
_diffrn_reflns_theta_max          25.00 
_reflns_number_total              6001 
_reflns_number_gt                 4471 
_reflns_threshold_expression      >2sigma(I) 
 
_computing_data_collection        'Bruker APEX2' 
_computing_cell_refinement        'Bruker SAINT' 
_computing_data_reduction         'Bruker SAINT  A '
_computing_structure_solution     'SHELXS-97 (Sheldrick, 1990)' 
_computing_structure_refinement   'SHELXL-97 (Sheldrick, 1997)' 
_computing_molecular_graphics     'Bruker SHELXTL' 
_computing_publication_material   'Bruker SHELXTL' 
 
_refine_special_details 
; 
 Refinement of F^2^ against ALL reflections.  The weighted R-factor wR and 
 goodness of fit S are based on F^2^, conventional R-factors R are based 
 on F, with F set to zero for negative F^2^. The threshold expression of 
 F^2^ > 2sigma(F^2^) is used only for calculating R-factors(gt) etc. and is 
 not relevant to the choice of reflections for refinement.  R-factors based 
 on F^2^ are statistically about twice as large as those based on F, and R- 
 factors based on ALL data will be even larger. 
; 
 
_refine_ls_structure_factor_coef  Fsqd  
_refine_ls_matrix_type            full 
_refine_ls_weighting_scheme       calc  
_refine_ls_weighting_details 
 'calc w=1/[\s^2^(Fo^2^)+(0.0299P)^2^+11.2292P] where P=(Fo^2^+2Fc^2^)/3' 
_atom_sites_solution_primary      direct 
_atom_sites_solution_secondary    difmap 
_atom_sites_solution_hydrogens    geom 
_refine_ls_hydrogen_treatment     constr
_refine_ls_extinction_method      none 
_refine_ls_extinction_coef        ? 
_refine_ls_number_reflns          6001 
_refine_ls_number_parameters      465 
_refine_ls_number_restraints      0 
_refine_ls_R_factor_all           0.0569 
_refine_ls_R_factor_gt            0.0364 
_refine_ls_wR_factor_ref          0.0857 
_refine_ls_wR_factor_gt           0.0766 
_refine_ls_goodness_of_fit_ref    1.022 
_refine_ls_restrained_S_all       1.022 
_refine_ls_shift/su_max           0.001 
_refine_ls_shift/su_mean          0.000 
 
loop_ 
 _atom_site_label 
 _atom_site_type_symbol 
 _atom_site_fract_x 
 _atom_site_fract_y 
 _atom_site_fract_z 
 _atom_site_U_iso_or_equiv 
 _atom_site_adp_type 
 _atom_site_occupancy 
 _atom_site_symmetry_multiplicity 
 _atom_site_calc_flag 
 _atom_site_refinement_flags 
 _atom_site_disorder_assembly 
 _atom_site_disorder_group 
Cd1 Cd 0.62705(2) 0.42193(2) 0.226428(6) 0.05112(10) Uani 1 1 d . . . 
C1 C 0.6013(3) 0.3243(2) 0.30413(9) 0.0471(8) Uani 1 1 d . . . 
C2 C 0.6744(3) 0.2966(2) 0.33828(8) 0.0434(8) Uani 1 1 d . . . 
C3 C 0.6538(3) 0.3251(3) 0.37258(9) 0.0574(10) Uani 1 1 d . . . 
H3 H 0.5903 0.3560 0.3748 0.069 Uiso 1 1 calc R . . 
C4 C 0.7261(3) 0.3086(3) 0.40378(9) 0.0602(10) Uani 1 1 d . . . 
H4 H 0.7128 0.3301 0.4267 0.072 Uiso 1 1 calc R . . 
C5 C 0.8185(3) 0.2598(2) 0.40083(10) 0.0504(9) Uani 1 1 d . . . 
C6 C 0.8377(3) 0.2281(2) 0.36685(10) 0.0553(9) Uani 1 1 d . . . 
H6 H 0.8984 0.1934 0.3649 0.066 Uiso 1 1 calc R . . 
C7 C 0.7670(3) 0.2476(2) 0.33580(9) 0.0500(9) Uani 1 1 d . . . 
H7 H 0.7816 0.2276 0.3128 0.060 Uiso 1 1 calc R . . 
C8 C 0.9553(3) 0.2527(2) 0.49260(9) 0.0529(9) Uani 1 1 d . . . 
C9 C 0.9237(3) 0.2816(3) 0.52525(10) 0.0666(11) Uani 1 1 d . . . 
H9 H 0.8539 0.3034 0.5256 0.080 Uiso 1 1 calc R . . 
C10 C 0.9945(3) 0.2786(3) 0.55739(10) 0.0605(10) Uani 1 1 d . . . 
H10 H 0.9731 0.2994 0.5794 0.073 Uiso 1 1 calc R . . 
C11 C 1.0971(3) 0.2448(2) 0.55700(8) 0.0469(8) Uani 1 1 d . . . 
C12 C 1.1305(3) 0.2148(3) 0.52430(9) 0.0576(10) Uani 1 1 d . . . 
H12 H 1.1998 0.1921 0.5240 0.069 Uiso 1 1 calc R . . 
C13 C 1.0579(3) 0.2194(3) 0.49191(9) 0.0580(10) Uani 1 1 d . . . 
H13 H 1.0790 0.1999 0.4697 0.070 Uiso 1 1 calc R . . 
C14 C 1.2603(3) 0.1980(3) 0.59429(9) 0.0568(10) Uani 1 1 d . . . 
H14A H 1.3138 0.2312 0.5828 0.068 Uiso 1 1 calc R . . 
H14B H 1.2509 0.1411 0.5822 0.068 Uiso 1 1 calc R . . 
C15 C 1.2971(3) 0.1861(2) 0.63474(9) 0.0529(9) Uani 1 1 d . . . 
C16 C 1.4022(3) 0.1986(4) 0.64877(13) 0.0965(18) Uani 1 1 d . . . 
H16 H 1.4527 0.2161 0.6334 0.116 Uiso 1 1 calc R . . 
C17 C 1.4334(4) 0.1851(4) 0.68591(14) 0.121(2) Uani 1 1 d . . . 
H17 H 1.5051 0.1935 0.6960 0.146 Uiso 1 1 calc R . . 
C18 C 1.3575(4) 0.1592(3) 0.70779(11) 0.0862(15) Uani 1 1 d . . . 
H18 H 1.3790 0.1504 0.7329 0.103 Uiso 1 1 calc R . . 
C19 C 1.2259(3) 0.1600(3) 0.65849(9) 0.0556(10) Uani 1 1 d . . . 
H19 H 1.1538 0.1517 0.6489 0.067 Uiso 1 1 calc R . . 
C20 C 0.5092(3) 0.5476(3) 0.16604(10) 0.0559(10) Uani 1 1 d . . . 
C21 C 0.4635(3) 0.5416(2) 0.12537(9) 0.0501(9) Uani 1 1 d . . . 
C22 C 0.3587(3) 0.5718(2) 0.11435(9) 0.0554(9) Uani 1 1 d . . . 
H22 H 0.3208 0.6001 0.1314 0.067 Uiso 1 1 calc R . . 
C23 C 0.3104(3) 0.5601(2) 0.07832(9) 0.0564(10) Uani 1 1 d . . . 
H23 H 0.2403 0.5803 0.0711 0.068 Uiso 1 1 calc R . . 
C24 C 0.3673(3) 0.5182(2) 0.05306(8) 0.0482(9) Uani 1 1 d . . . 
C25 C 0.4727(3) 0.4907(3) 0.06344(9) 0.0559(10) Uani 1 1 d . . . 
H25 H 0.5118 0.4645 0.0462 0.067 Uiso 1 1 calc R . . 
C26 C 0.5197(3) 0.5024(3) 0.09963(9) 0.0567(10) Uani 1 1 d . . . 
H26 H 0.5904 0.4834 0.1066 0.068 Uiso 1 1 calc R . . 
C27 C 0.1799(3) 0.5090(2) -0.02913(8) 0.0485(9) Uani 1 1 d . . . 
C28 C 0.0760(3) 0.5402(3) -0.03773(9) 0.0591(10) Uani 1 1 d . . . 
H28 H 0.0428 0.5690 -0.0196 0.071 Uiso 1 1 calc R . . 
C29 C 0.0199(3) 0.5296(3) -0.07265(9) 0.0584(10) Uani 1 1 d . . . 
H29 H -0.0502 0.5515 -0.0782 0.070 Uiso 1 1 calc R . . 
C30 C 0.0696(3) 0.4860(2) -0.09924(9) 0.0496(9) Uani 1 1 d . . . 
C31 C 0.1756(3) 0.4546(2) -0.09094(9) 0.0513(9) Uani 1 1 d . . . 
H31 H 0.2091 0.4262 -0.1090 0.062 Uiso 1 1 calc R . . 
C32 C 0.2302(3) 0.4659(2) -0.05598(9) 0.0502(9) Uani 1 1 d . . . 
H32 H 0.3006 0.4447 -0.0504 0.060 Uiso 1 1 calc R . . 
C33 C -0.0888(3) 0.4894(3) -0.14286(10) 0.0748(13) Uani 1 1 d . . . 
H33A H -0.1006 0.5522 -0.1404 0.090 Uiso 1 1 calc R . . 
H33B H -0.1296 0.4588 -0.1258 0.090 Uiso 1 1 calc R . . 
C34 C -0.1264(3) 0.4606(3) -0.18169(10) 0.0596(10) Uani 1 1 d . . . 
C35 C -0.0976(4) 0.3824(3) -0.19533(13) 0.1032(19) Uani 1 1 d . . . 
H35 H -0.0505 0.3447 -0.1811 0.124 Uiso 1 1 calc R . . 
C36 C -0.1395(5) 0.3602(4) -0.23066(15) 0.126(3) Uani 1 1 d . . . 
H36 H -0.1223 0.3062 -0.2405 0.152 Uiso 1 1 calc R . . 
C37 C -0.2069(4) 0.4175(3) -0.25155(12) 0.0923(16) Uani 1 1 d . . . 
H37 H -0.2327 0.4018 -0.2757 0.111 Uiso 1 1 calc R . . 
C38 C -0.1951(3) 0.5134(3) -0.20424(9) 0.0607(11) Uani 1 1 d . . . 
H38 H -0.2145 0.5672 -0.1948 0.073 Uiso 1 1 calc R . . 
N1 N 0.9018(3) 0.2417(2) 0.43147(8) 0.0592(8) Uani 1 1 d . . . 
N2 N 0.8733(3) 0.2642(2) 0.46095(8) 0.0619(8) Uani 1 1 d . . . 
N3 N 1.2541(2) 0.1460(2) 0.69458(8) 0.0592(8) Uani 1 1 d . . . 
N4 N 0.3237(2) 0.5007(2) 0.01532(7) 0.0538(8) Uani 1 1 d . . . 
N5 N 0.2279(2) 0.5245(2) 0.00797(7) 0.0546(8) Uani 1 1 d . . . 
N6 N -0.2366(2) 0.4932(2) -0.23903(7) 0.0594(8) Uani 1 1 d . . . 
O1 O 0.64398(19) 0.32695(16) 0.27457(6) 0.0550(6) Uani 1 1 d . . . 
O2 O 0.5059(2) 0.34422(19) 0.30782(6) 0.0658(7) Uani 1 1 d . . . 
O3 O 1.16039(19) 0.24399(17) 0.59077(6) 0.0577(7) Uani 1 1 d . . . 
O4 O 0.6016(2) 0.51491(19) 0.17538(6) 0.0657(7) Uani 1 1 d . . . 
O5 O 0.4496(3) 0.5821(2) 0.18703(7) 0.0812(9) Uani 1 1 d . . . 
O6 O 0.02268(19) 0.47001(18) -0.13453(6) 0.0611(7) Uani 1 1 d . . . 
O1W O 0.5000 0.5089(2) 0.2500 0.0574(9) Uani 1 2 d S . . 
H1W H 0.4844 0.5410 0.2310 0.069 Uiso 1 1 d R . . 
 
loop_ 
 _atom_site_aniso_label 
 _atom_site_aniso_U_11 
 _atom_site_aniso_U_22 
 _atom_site_aniso_U_33 
 _atom_site_aniso_U_23 
 _atom_site_aniso_U_13 
 _atom_site_aniso_U_12 
Cd1 0.04567(16) 0.0798(2) 0.02539(13) 0.00169(12) -0.00536(10) -0.00639(14) 
C1 0.052(2) 0.052(2) 0.0351(19) 0.0029(15) -0.0030(16) 0.0007(18) 
C2 0.045(2) 0.052(2) 0.0326(17) 0.0066(15) 0.0015(14) 0.0019(16) 
C3 0.060(2) 0.072(3) 0.0396(19) 0.0042(18) 0.0036(17) 0.023(2) 
C4 0.074(3) 0.077(3) 0.0288(18) 0.0009(17) 0.0020(17) 0.018(2) 
C5 0.045(2) 0.053(2) 0.050(2) 0.0113(17) -0.0054(16) 0.0034(17) 
C6 0.046(2) 0.064(2) 0.054(2) -0.0009(19) -0.0001(17) 0.0098(18) 
C7 0.048(2) 0.062(2) 0.0398(19) -0.0028(17) 0.0036(16) 0.0038(18) 
C8 0.055(2) 0.061(2) 0.0395(19) 0.0072(17) -0.0054(16) 0.0040(19) 
C9 0.059(2) 0.091(3) 0.049(2) 0.003(2) 0.0033(19) 0.018(2) 
C10 0.058(2) 0.082(3) 0.040(2) -0.0024(19) 0.0029(17) 0.015(2) 
C11 0.053(2) 0.054(2) 0.0331(17) 0.0053(15) 0.0016(15) 0.0011(17) 
C12 0.061(2) 0.076(3) 0.0363(19) 0.0061(18) 0.0083(17) 0.018(2) 
C13 0.074(3) 0.069(3) 0.0303(18) -0.0002(17) 0.0060(17) 0.006(2) 
C14 0.054(2) 0.076(3) 0.0406(19) 0.0064(18) 0.0046(17) 0.009(2) 
C15 0.045(2) 0.068(3) 0.045(2) 0.0078(18) 0.0017(17) 0.0051(18) 
C16 0.050(3) 0.164(5) 0.072(3) 0.043(3) -0.005(2) -0.022(3) 
C17 0.056(3) 0.217(7) 0.083(3) 0.060(4) -0.022(3) -0.041(4) 
C18 0.067(3) 0.139(4) 0.044(2) 0.018(3) -0.024(2) -0.019(3) 
C19 0.042(2) 0.085(3) 0.0388(19) -0.0008(18) -0.0016(16) -0.0004(19) 
C20 0.065(3) 0.065(3) 0.0343(19) 0.0149(17) -0.0058(19) -0.009(2) 
C21 0.052(2) 0.061(2) 0.0348(18) 0.0103(16) -0.0049(16) -0.0087(18) 
C22 0.058(2) 0.071(3) 0.0364(18) 0.0014(18) 0.0014(16) 0.003(2) 
C23 0.050(2) 0.075(3) 0.041(2) 0.0054(18) -0.0057(17) 0.0043(19) 
C24 0.051(2) 0.062(2) 0.0301(17) 0.0096(16) -0.0028(15) -0.0070(18) 
C25 0.046(2) 0.083(3) 0.0375(19) 0.0034(18) 0.0038(16) 0.000(2) 
C26 0.042(2) 0.088(3) 0.0387(19) 0.0125(19) -0.0019(16) -0.003(2) 
C27 0.046(2) 0.066(2) 0.0312(17) 0.0018(16) -0.0039(15) 0.0032(18) 
C28 0.058(2) 0.081(3) 0.0354(18) -0.0038(18) -0.0034(17) 0.017(2) 
C29 0.049(2) 0.081(3) 0.042(2) -0.0031(19) -0.0053(17) 0.019(2) 
C30 0.049(2) 0.063(2) 0.0331(17) 0.0005(16) -0.0081(15) 0.0030(18) 
C31 0.045(2) 0.068(2) 0.0397(19) -0.0016(17) -0.0006(16) 0.0070(18) 
C32 0.0363(19) 0.071(2) 0.0411(19) 0.0030(18) -0.0052(15) 0.0024(17) 
C33 0.053(2) 0.122(4) 0.044(2) -0.006(2) -0.0157(18) 0.022(2) 
C34 0.055(2) 0.078(3) 0.041(2) -0.0067(19) -0.0134(17) 0.010(2) 
C35 0.128(5) 0.084(3) 0.081(3) -0.013(3) -0.052(3) 0.037(3) 
C36 0.161(6) 0.090(4) 0.107(4) -0.048(3) -0.065(4) 0.056(4) 
C37 0.108(4) 0.093(4) 0.064(3) -0.031(3) -0.038(3) 0.024(3) 
C38 0.056(2) 0.083(3) 0.038(2) -0.0114(19) -0.0112(17) 0.019(2) 
N1 0.062(2) 0.063(2) 0.0507(18) 0.0037(16) 0.0003(16) 0.0074(16) 
N2 0.067(2) 0.073(2) 0.0455(17) 0.0017(16) 0.0050(16) 0.0050(17) 
N3 0.0496(19) 0.089(2) 0.0360(15) 0.0048(15) -0.0075(13) -0.0021(17) 
N4 0.0475(18) 0.075(2) 0.0365(15) 0.0041(14) -0.0044(13) 0.0009(16) 
N5 0.0515(19) 0.073(2) 0.0359(16) 0.0016(14) -0.0065(13) 0.0035(16) 
N6 0.063(2) 0.073(2) 0.0369(16) -0.0107(15) -0.0144(14) 0.0113(17) 
O1 0.0631(16) 0.0690(17) 0.0317(12) 0.0025(11) 0.0012(11) 0.0024(13) 
O2 0.0489(16) 0.100(2) 0.0456(14) 0.0145(14) -0.0044(12) 0.0150(15) 
O3 0.0582(15) 0.0810(18) 0.0323(12) -0.0004(12) -0.0009(11) 0.0162(14) 
O4 0.0545(16) 0.102(2) 0.0369(13) 0.0183(13) -0.0075(12) -0.0047(15) 
O5 0.102(2) 0.105(2) 0.0325(14) 0.0041(15) -0.0065(15) 0.0313(19) 
O6 0.0491(15) 0.094(2) 0.0362(13) -0.0089(13) -0.0109(11) 0.0137(14) 
O1W 0.069(2) 0.073(2) 0.0269(16) 0.000 -0.0079(15) 0.000 
 
_geom_special_details 
; 
 All esds (except the esd in the dihedral angle between two l.s. planes) 
 are estimated using the full covariance matrix.  The cell esds are taken 
 into account individually in the estimation of esds in distances, angles 
 and torsion angles; correlations between esds in cell parameters are only 
 used when they are defined by crystal symmetry.  An approximate (isotropic) 
 treatment of cell esds is used for estimating esds involving l.s. planes. 
; 
 
loop_ 
 _geom_bond_atom_site_label_1 
 _geom_bond_atom_site_label_2 
 _geom_bond_distance 
 _geom_bond_site_symmetry_2 
 _geom_bond_publ_flag 
Cd1 O1 2.260(2) . ? 
Cd1 O2 2.271(2) 2_655 ? 
Cd1 O1W 2.306(2) . ? 
Cd1 N3 2.316(3) 8_455 ? 
Cd1 O4 2.325(2) . ? 
Cd1 N6 2.362(3) 6_666 ? 
C1 O2 1.248(4) . ? 
C1 O1 1.259(4) . ? 
C1 C2 1.505(4) . ? 
C2 C3 1.376(4) . ? 
C2 C7 1.383(5) . ? 
C3 C4 1.381(5) . ? 
C3 H3 0.9300 . ? 
C4 C5 1.382(5) . ? 
C4 H4 0.9300 . ? 
C5 C6 1.377(5) . ? 
C5 N1 1.450(4) . ? 
C6 C7 1.375(4) . ? 
C6 H6 0.9300 . ? 
C7 H7 0.9300 . ? 
C8 C9 1.371(5) . ? 
C8 C13 1.375(5) . ? 
C8 N2 1.450(4) . ? 
C9 C10 1.374(5) . ? 
C9 H9 0.9300 . ? 
C10 C11 1.378(5) . ? 
C10 H10 0.9300 . ? 
C11 O3 1.374(4) . ? 
C11 C12 1.386(4) . ? 
C12 C13 1.394(5) . ? 
C12 H12 0.9300 . ? 
C13 H13 0.9300 . ? 
C14 O3 1.416(4) . ? 
C14 C15 1.498(4) . ? 
C14 H14A 0.9700 . ? 
C14 H14B 0.9700 . ? 
C15 C16 1.354(5) . ? 
C15 C19 1.371(5) . ? 
C16 C17 1.375(6) . ? 
C16 H16 0.9300 . ? 
C17 C18 1.367(6) . ? 
C17 H17 0.9300 . ? 
C18 N3 1.329(5) . ? 
C18 H18 0.9300 . ? 
C19 N3 1.334(4) . ? 
C19 H19 0.9300 . ? 
C20 O5 1.246(5) . ? 
C20 O4 1.257(4) . ? 
C20 C21 1.522(4) . ? 
C21 C26 1.373(5) . ? 
C21 C22 1.391(5) . ? 
C22 C23 1.384(5) . ? 
C22 H22 0.9300 . ? 
C23 C24 1.384(5) . ? 
C23 H23 0.9300 . ? 
C24 C25 1.382(5) . ? 
C24 N4 1.438(4) . ? 
C25 C26 1.385(5) . ? 
C25 H25 0.9300 . ? 
C26 H26 0.9300 . ? 
C27 C28 1.374(5) . ? 
C27 C32 1.390(5) . ? 
C27 N5 1.427(4) . ? 
C28 C29 1.381(5) . ? 
C28 H28 0.9300 . ? 
C29 C30 1.381(5) . ? 
C29 H29 0.9300 . ? 
C30 O6 1.365(4) . ? 
C30 C31 1.398(5) . ? 
C31 C32 1.377(4) . ? 
C31 H31 0.9300 . ? 
C32 H32 0.9300 . ? 
C33 O6 1.412(4) . ? 
C33 C34 1.498(5) . ? 
C33 H33A 0.9700 . ? 
C33 H33B 0.9700 . ? 
C34 C35 1.352(6) . ? 
C34 C38 1.367(5) . ? 
C35 C36 1.369(6) . ? 
C35 H35 0.9300 . ? 
C36 C37 1.370(6) . ? 
C36 H36 0.9300 . ? 
C37 N6 1.307(5) . ? 
C37 H37 0.9300 . ? 
C38 N6 1.342(4) . ? 
C38 H38 0.9300 . ? 
N1 N2 1.221(4) . ? 
N3 Cd1 2.316(3) 8_556 ? 
N4 N5 1.241(4) . ? 
N6 Cd1 2.362(3) 6_465 ? 
O2 Cd1 2.271(2) 2_655 ? 
O1W Cd1 2.306(2) 2_655 ? 
O1W H1W 0.8499 . ? 
 
loop_ 
 _geom_angle_atom_site_label_1 
 _geom_angle_atom_site_label_2 
 _geom_angle_atom_site_label_3 
 _geom_angle 
 _geom_angle_site_symmetry_1 
 _geom_angle_site_symmetry_3 
 _geom_angle_publ_flag 
O1 Cd1 O2 94.87(9) . 2_655 ? 
O1 Cd1 O1W 94.45(8) . . ? 
O2 Cd1 O1W 90.98(8) 2_655 . ? 
O1 Cd1 N3 95.83(10) . 8_455 ? 
O2 Cd1 N3 89.32(10) 2_655 8_455 ? 
O1W Cd1 N3 169.65(10) . 8_455 ? 
O1 Cd1 O4 176.80(9) . . ? 
O2 Cd1 O4 81.94(10) 2_655 . ? 
O1W Cd1 O4 85.37(9) . . ? 
N3 Cd1 O4 84.42(11) 8_455 . ? 
O1 Cd1 N6 86.81(10) . 6_666 ? 
O2 Cd1 N6 178.18(11) 2_655 6_666 ? 
O1W Cd1 N6 88.18(9) . 6_666 ? 
N3 Cd1 N6 91.22(11) 8_455 6_666 ? 
O4 Cd1 N6 96.38(10) . 6_666 ? 
O2 C1 O1 126.4(3) . . ? 
O2 C1 C2 117.5(3) . . ? 
O1 C1 C2 116.1(3) . . ? 
C3 C2 C7 118.7(3) . . ? 
C3 C2 C1 120.1(3) . . ? 
C7 C2 C1 121.1(3) . . ? 
C2 C3 C4 120.9(3) . . ? 
C2 C3 H3 119.5 . . ? 
C4 C3 H3 119.5 . . ? 
C3 C4 C5 119.6(3) . . ? 
C3 C4 H4 120.2 . . ? 
C5 C4 H4 120.2 . . ? 
C6 C5 C4 119.8(3) . . ? 
C6 C5 N1 116.0(3) . . ? 
C4 C5 N1 124.1(3) . . ? 
C7 C6 C5 119.9(3) . . ? 
C7 C6 H6 120.1 . . ? 
C5 C6 H6 120.1 . . ? 
C6 C7 C2 120.9(3) . . ? 
C6 C7 H7 119.5 . . ? 
C2 C7 H7 119.5 . . ? 
C9 C8 C13 120.1(3) . . ? 
C9 C8 N2 113.7(3) . . ? 
C13 C8 N2 126.2(3) . . ? 
C8 C9 C10 120.4(4) . . ? 
C8 C9 H9 119.8 . . ? 
C10 C9 H9 119.8 . . ? 
C9 C10 C11 119.9(3) . . ? 
C9 C10 H10 120.1 . . ? 
C11 C10 H10 120.1 . . ? 
O3 C11 C10 114.9(3) . . ? 
O3 C11 C12 124.5(3) . . ? 
C10 C11 C12 120.6(3) . . ? 
C11 C12 C13 118.6(3) . . ? 
C11 C12 H12 120.7 . . ? 
C13 C12 H12 120.7 . . ? 
C8 C13 C12 120.4(3) . . ? 
C8 C13 H13 119.8 . . ? 
C12 C13 H13 119.8 . . ? 
O3 C14 C15 107.7(3) . . ? 
O3 C14 H14A 110.2 . . ? 
C15 C14 H14A 110.2 . . ? 
O3 C14 H14B 110.2 . . ? 
C15 C14 H14B 110.2 . . ? 
H14A C14 H14B 108.5 . . ? 
C16 C15 C19 118.1(3) . . ? 
C16 C15 C14 121.0(4) . . ? 
C19 C15 C14 120.9(3) . . ? 
C15 C16 C17 119.3(4) . . ? 
C15 C16 H16 120.4 . . ? 
C17 C16 H16 120.4 . . ? 
C18 C17 C16 119.1(4) . . ? 
C18 C17 H17 120.4 . . ? 
C16 C17 H17 120.4 . . ? 
N3 C18 C17 122.6(4) . . ? 
N3 C18 H18 118.7 . . ? 
C17 C18 H18 118.7 . . ? 
N3 C19 C15 123.9(3) . . ? 
N3 C19 H19 118.1 . . ? 
C15 C19 H19 118.1 . . ? 
O5 C20 O4 126.4(3) . . ? 
O5 C20 C21 116.4(3) . . ? 
O4 C20 C21 117.2(4) . . ? 
C26 C21 C22 118.9(3) . . ? 
C26 C21 C20 122.1(3) . . ? 
C22 C21 C20 118.9(3) . . ? 
C23 C22 C21 120.6(4) . . ? 
C23 C22 H22 119.7 . . ? 
C21 C22 H22 119.7 . . ? 
C24 C23 C22 119.5(3) . . ? 
C24 C23 H23 120.2 . . ? 
C22 C23 H23 120.2 . . ? 
C25 C24 C23 120.2(3) . . ? 
C25 C24 N4 115.8(3) . . ? 
C23 C24 N4 123.9(3) . . ? 
C24 C25 C26 119.6(3) . . ? 
C24 C25 H25 120.2 . . ? 
C26 C25 H25 120.2 . . ? 
C21 C26 C25 121.1(3) . . ? 
C21 C26 H26 119.5 . . ? 
C25 C26 H26 119.5 . . ? 
C28 C27 C32 119.7(3) . . ? 
C28 C27 N5 115.4(3) . . ? 
C32 C27 N5 124.9(3) . . ? 
C27 C28 C29 121.4(3) . . ? 
C27 C28 H28 119.3 . . ? 
C29 C28 H28 119.3 . . ? 
C28 C29 C30 118.9(3) . . ? 
C28 C29 H29 120.6 . . ? 
C30 C29 H29 120.6 . . ? 
O6 C30 C29 124.8(3) . . ? 
O6 C30 C31 115.0(3) . . ? 
C29 C30 C31 120.3(3) . . ? 
C32 C31 C30 120.0(3) . . ? 
C32 C31 H31 120.0 . . ? 
C30 C31 H31 120.0 . . ? 
C31 C32 C27 119.7(3) . . ? 
C31 C32 H32 120.1 . . ? 
C27 C32 H32 120.1 . . ? 
O6 C33 C34 108.8(3) . . ? 
O6 C33 H33A 109.9 . . ? 
C34 C33 H33A 109.9 . . ? 
O6 C33 H33B 109.9 . . ? 
C34 C33 H33B 109.9 . . ? 
H33A C33 H33B 108.3 . . ? 
C35 C34 C38 117.9(3) . . ? 
C35 C34 C33 122.5(4) . . ? 
C38 C34 C33 119.5(4) . . ? 
C34 C35 C36 118.4(4) . . ? 
C34 C35 H35 120.8 . . ? 
C36 C35 H35 120.8 . . ? 
C35 C36 C37 120.0(4) . . ? 
C35 C36 H36 120.0 . . ? 
C37 C36 H36 120.0 . . ? 
N6 C37 C36 123.0(4) . . ? 
N6 C37 H37 118.5 . . ? 
C36 C37 H37 118.5 . . ? 
N6 C38 C34 124.8(4) . . ? 
N6 C38 H38 117.6 . . ? 
C34 C38 H38 117.6 . . ? 
N2 N1 C5 111.5(3) . . ? 
N1 N2 C8 114.4(3) . . ? 
C18 N3 C19 117.0(3) . . ? 
C18 N3 Cd1 125.1(3) . 8_556 ? 
C19 N3 Cd1 117.0(2) . 8_556 ? 
N5 N4 C24 112.8(3) . . ? 
N4 N5 C27 115.6(3) . . ? 
C37 N6 C38 116.0(3) . . ? 
C37 N6 Cd1 120.6(2) . 6_465 ? 
C38 N6 Cd1 122.9(3) . 6_465 ? 
C1 O1 Cd1 132.5(2) . . ? 
C1 O2 Cd1 134.6(2) . 2_655 ? 
C11 O3 C14 118.8(3) . . ? 
C20 O4 Cd1 118.9(2) . . ? 
C30 O6 C33 117.2(3) . . ? 
Cd1 O1W Cd1 110.14(14) 2_655 . ? 
Cd1 O1W H1W 122.4 2_655 . ? 
Cd1 O1W H1W 97.0 . . ? 
 
loop_ 
 _geom_torsion_atom_site_label_1 
 _geom_torsion_atom_site_label_2 
 _geom_torsion_atom_site_label_3 
 _geom_torsion_atom_site_label_4 
 _geom_torsion 
 _geom_torsion_site_symmetry_1 
 _geom_torsion_site_symmetry_2 
 _geom_torsion_site_symmetry_3 
 _geom_torsion_site_symmetry_4 
 _geom_torsion_publ_flag 
O2 C1 C2 C3 -25.5(5) . . . . ? 
O1 C1 C2 C3 152.9(3) . . . . ? 
O2 C1 C2 C7 159.0(3) . . . . ? 
O1 C1 C2 C7 -22.6(5) . . . . ? 
C7 C2 C3 C4 2.7(6) . . . . ? 
C1 C2 C3 C4 -172.9(4) . . . . ? 
C2 C3 C4 C5 -2.5(6) . . . . ? 
C3 C4 C5 C6 0.0(6) . . . . ? 
C3 C4 C5 N1 177.3(4) . . . . ? 
C4 C5 C6 C7 2.3(6) . . . . ? 
N1 C5 C6 C7 -175.2(3) . . . . ? 
C5 C6 C7 C2 -2.1(6) . . . . ? 
C3 C2 C7 C6 -0.4(5) . . . . ? 
C1 C2 C7 C6 175.1(3) . . . . ? 
C13 C8 C9 C10 0.8(6) . . . . ? 
N2 C8 C9 C10 -177.1(4) . . . . ? 
C8 C9 C10 C11 -1.3(6) . . . . ? 
C9 C10 C11 O3 -179.2(4) . . . . ? 
C9 C10 C11 C12 0.9(6) . . . . ? 
O3 C11 C12 C13 180.0(3) . . . . ? 
C10 C11 C12 C13 -0.2(6) . . . . ? 
C9 C8 C13 C12 0.0(6) . . . . ? 
N2 C8 C13 C12 177.6(4) . . . . ? 
C11 C12 C13 C8 -0.3(6) . . . . ? 
O3 C14 C15 C16 -137.3(4) . . . . ? 
O3 C14 C15 C19 44.3(5) . . . . ? 
C19 C15 C16 C17 -0.1(8) . . . . ? 
C14 C15 C16 C17 -178.5(5) . . . . ? 
C15 C16 C17 C18 0.1(10) . . . . ? 
C16 C17 C18 N3 0.3(10) . . . . ? 
C16 C15 C19 N3 -0.3(7) . . . . ? 
C14 C15 C19 N3 178.2(4) . . . . ? 
O5 C20 C21 C26 -177.8(4) . . . . ? 
O4 C20 C21 C26 0.0(5) . . . . ? 
O5 C20 C21 C22 -1.9(5) . . . . ? 
O4 C20 C21 C22 175.9(3) . . . . ? 
C26 C21 C22 C23 2.0(6) . . . . ? 
C20 C21 C22 C23 -174.0(3) . . . . ? 
C21 C22 C23 C24 -0.2(6) . . . . ? 
C22 C23 C24 C25 -2.1(6) . . . . ? 
C22 C23 C24 N4 178.3(3) . . . . ? 
C23 C24 C25 C26 2.4(6) . . . . ? 
N4 C24 C25 C26 -177.9(3) . . . . ? 
C22 C21 C26 C25 -1.7(6) . . . . ? 
C20 C21 C26 C25 174.2(3) . . . . ? 
C24 C25 C26 C21 -0.5(6) . . . . ? 
C32 C27 C28 C29 0.1(6) . . . . ? 
N5 C27 C28 C29 -180.0(4) . . . . ? 
C27 C28 C29 C30 0.5(6) . . . . ? 
C28 C29 C30 O6 178.9(4) . . . . ? 
C28 C29 C30 C31 -1.1(6) . . . . ? 
O6 C30 C31 C32 -179.0(3) . . . . ? 
C29 C30 C31 C32 1.0(6) . . . . ? 
C30 C31 C32 C27 -0.4(6) . . . . ? 
C28 C27 C32 C31 -0.1(6) . . . . ? 
N5 C27 C32 C31 179.9(3) . . . . ? 
O6 C33 C34 C35 43.9(6) . . . . ? 
O6 C33 C34 C38 -138.3(4) . . . . ? 
C38 C34 C35 C36 -0.6(8) . . . . ? 
C33 C34 C35 C36 177.3(5) . . . . ? 
C34 C35 C36 C37 1.5(10) . . . . ? 
C35 C36 C37 N6 -2.0(10) . . . . ? 
C35 C34 C38 N6 0.2(7) . . . . ? 
C33 C34 C38 N6 -177.8(4) . . . . ? 
C6 C5 N1 N2 -173.1(3) . . . . ? 
C4 C5 N1 N2 9.6(5) . . . . ? 
C5 N1 N2 C8 -176.6(3) . . . . ? 
C9 C8 N2 N1 177.4(4) . . . . ? 
C13 C8 N2 N1 -0.4(6) . . . . ? 
C17 C18 N3 C19 -0.6(8) . . . . ? 
C17 C18 N3 Cd1 168.0(5) . . . 8_556 ? 
C15 C19 N3 C18 0.6(6) . . . . ? 
C15 C19 N3 Cd1 -169.0(3) . . . 8_556 ? 
C25 C24 N4 N5 178.0(3) . . . . ? 
C23 C24 N4 N5 -2.3(5) . . . . ? 
C24 N4 N5 C27 180.0(3) . . . . ? 
C28 C27 N5 N4 -176.3(3) . . . . ? 
C32 C27 N5 N4 3.7(5) . . . . ? 
C36 C37 N6 C38 1.5(8) . . . . ? 
C36 C37 N6 Cd1 -170.8(5) . . . 6_465 ? 
C34 C38 N6 C37 -0.6(6) . . . . ? 
C34 C38 N6 Cd1 171.5(3) . . . 6_465 ? 
O2 C1 O1 Cd1 37.8(5) . . . . ? 
C2 C1 O1 Cd1 -140.4(2) . . . . ? 
O2 Cd1 O1 C1 -93.1(3) 2_655 . . . ? 
O1W Cd1 O1 C1 -1.8(3) . . . . ? 
N3 Cd1 O1 C1 177.1(3) 8_455 . . . ? 
O4 Cd1 O1 C1 -88.5(17) . . . . ? 
N6 Cd1 O1 C1 86.2(3) 6_666 . . . ? 
O1 C1 O2 Cd1 -17.4(6) . . . 2_655 ? 
C2 C1 O2 Cd1 160.8(2) . . . 2_655 ? 
C10 C11 O3 C14 170.1(3) . . . . ? 
C12 C11 O3 C14 -10.0(5) . . . . ? 
C15 C14 O3 C11 -164.6(3) . . . . ? 
O5 C20 O4 Cd1 45.8(5) . . . . ? 
C21 C20 O4 Cd1 -131.7(3) . . . . ? 
O1 Cd1 O4 C20 54.0(18) . . . . ? 
O2 Cd1 O4 C20 58.6(3) 2_655 . . . ? 
O1W Cd1 O4 C20 -33.1(3) . . . . ? 
N3 Cd1 O4 C20 148.7(3) 8_455 . . . ? 
N6 Cd1 O4 C20 -120.7(3) 6_666 . . . ? 
C29 C30 O6 C33 -8.5(6) . . . . ? 
C31 C30 O6 C33 171.5(4) . . . . ? 
C34 C33 O6 C30 -175.5(3) . . . . ? 
O1 Cd1 O1W Cd1 -43.41(6) . . . 2_655 ? 
O2 Cd1 O1W Cd1 51.55(7) 2_655 . . 2_655 ? 
N3 Cd1 O1W Cd1 143.1(5) 8_455 . . 2_655 ? 
O4 Cd1 O1W Cd1 133.38(7) . . . 2_655 ? 
N6 Cd1 O1W Cd1 -130.07(7) 6_666 . . 2_655 ? 
 
loop_ 
 _geom_hbond_atom_site_label_D 
 _geom_hbond_atom_site_label_H 
 _geom_hbond_atom_site_label_A 
 _geom_hbond_distance_DH 
 _geom_hbond_distance_HA 
 _geom_hbond_distance_DA 
 _geom_hbond_angle_DHA 
 _geom_hbond_site_symmetry_A 
O1W H1W O5  0.85 1.72 2.555(3) 166.2 . 
C36 H36 O1  0.93 2.37 3.258(5) 159.5 7 
C38 H38 O1  0.93 2.54 3.176(4) 126.3 6_465 
 
_diffrn_measured_fraction_theta_max    0.999 
_diffrn_reflns_theta_full              25.00 
_diffrn_measured_fraction_theta_full   0.999 
_refine_diff_density_max    0.415 
_refine_diff_density_min   -0.313 
_refine_diff_density_rms    0.055 
